# Supplementary material for: On the Origin of Neo-Sex Chromosomes in the Neotropical Dragonflies Rhionaeschna bonariensis and R. planaltica (Aeshnidae, Odonata)
Source: MDPI journal article supplement (doi:10.3390/insects13121159), 2022-12-15
Supplement: s1 [file s1]

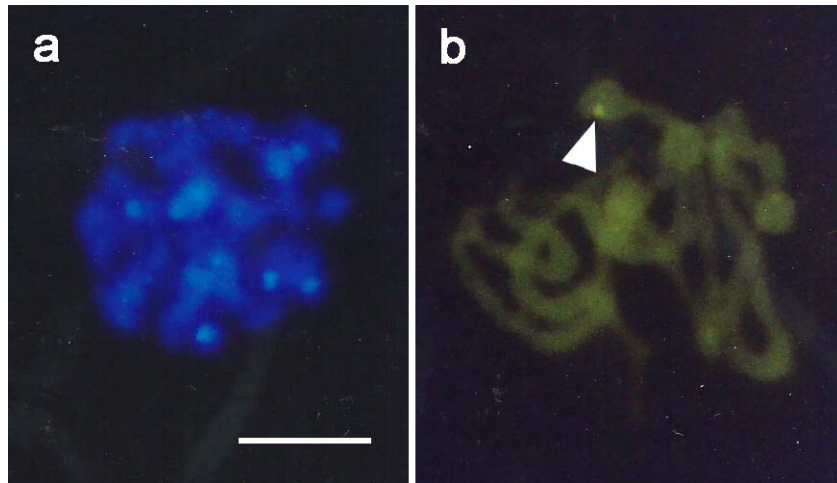

**Figure S1.** DAPI-CMA<sub>3</sub> banding of male meiotic chromosomes in *Rhionaeschna planaltica*. **a** - DAPI banding, diplotene. **b** - CMA<sub>3</sub> banding, pachytene; arrowhead points to CMA<sub>3</sub>-positive band. Bar = 10  $\mu$ m.
